# Supplementary material for: HBV infection increases the risk of macular degeneration: the roles of HBx-mediated sensitization of retinal pigment epithelial cells to UV and blue light irradiation
Source: Springer Nature journal article supplement (doi:10.1186/s12967-018-1594-4), 2018-08-10
Supplement: MOESM1 [file 16026162]

**Figure S1****A**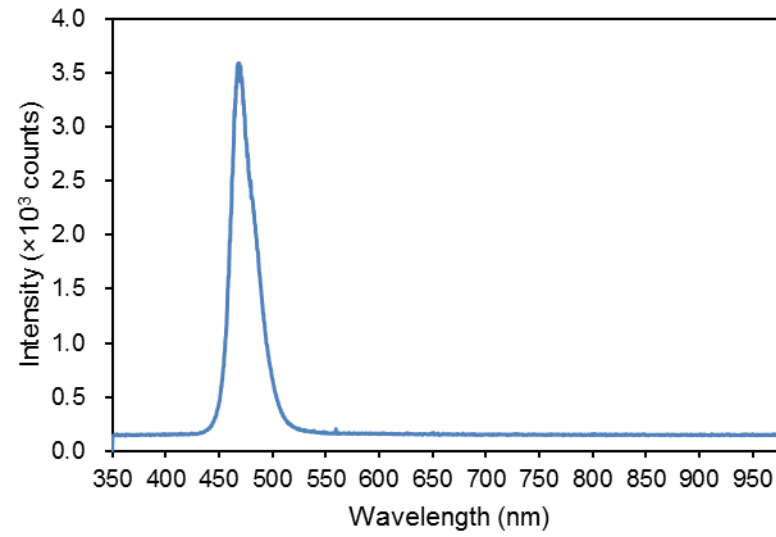**B**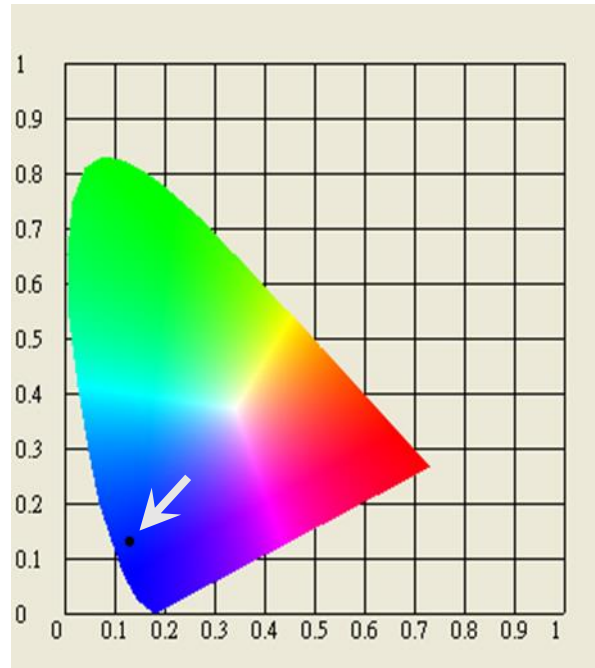**C**

| Test No.       | Value (W/m <sup>2</sup> ) |
|----------------|---------------------------|
| 1              | 25.7                      |
| 2              | 26                        |
| 3              | 26.1                      |
| 4              | 26.1                      |
| 5              | 26.1                      |
| 6              | 26.3                      |
| 7              | 26.3                      |
| 8              | 26.5                      |
| 9              | 26.5                      |
| 10             | 26.6                      |
| 11             | 26.6                      |
| 12             | 26.6                      |
| 13             | 26.6                      |
| <b>Average</b> | <b>26.3</b>               |
| <b>SD</b>      | <b>0.29</b>               |
| <b>CV</b>      | <b>1.10%</b>              |
